# Supplementary material for: Phage Display Screening of Bovine Antibodies to Foot-and-Mouth Disease Virus and Their Application in a Competitive ELISA for Serodiagnosis
Source: MDPI journal article supplement (doi:10.3390/ijms22094328), 2021-04-21
Supplement: s1 [file s1]

## **Supplementary Materials**

### **Phage Display Screening of Bovine Antibodies to Foot-and-Mouth Disease Virus and Their Application in a Competitive ELISA for Serodiagnosis**

Sukyo Jeong<sup>1</sup>, Hyun Joo Ahn<sup>1</sup>, Kyung-Jin Min<sup>1</sup>, Jae-Won Byun<sup>2</sup>, Hyun Mi Pyo<sup>2</sup>, Mi-Young Park<sup>2</sup>, Bok Kyung Ku<sup>2</sup>, Jinju Nah<sup>2</sup>, Soyoon Ryoo<sup>2</sup>, Sung-Hwan Wee<sup>2</sup> and Sang Jick Kim<sup>1,\*</sup>.

<sup>1</sup> Synthetic Biology and Bioengineering Research Center, Korea Research Institute of Bioscience and Biotechnology, Daejeon 34141, Korea

<sup>2</sup> Foot-and-Mouth Disease Division, Animal and Plant Quarantine Agency, Gyongsangbuk-do 39660, Korea

**Figure S1. Expression and purification of scFv-Fcs using HEK293E cells.** 12% SDS-PAGE analysis of the purified scFv-Fcs by affinity chromatography using Protein G-agarose resin. All the scFv-Fcs were detected at the predicted molecular weight of around 55 kDa (black arrow).

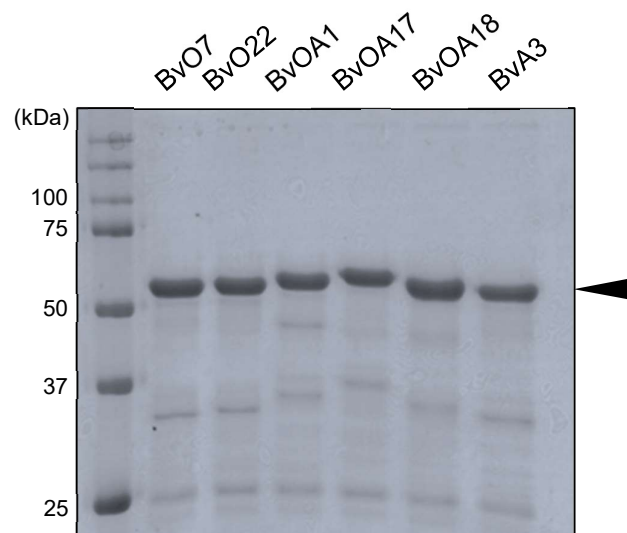

**Figure S2. Preliminary SPCE tests to select representative bovine scFv clones.** Binding of biotin-labeled, O type-specific (A) and pan-serotype specific (B) scFvs to FMDV type O antigen (O1 Manisa) in the presence of 1/10 dilution of respective serum was detected using NA-HRP. The test serum samples were derived from vaccinated cattle and FMDV (O/Anseong/SKR/2002)-challenged pigs. One hundred percent binding corresponds to the value of absorbance obtained in the presence of FBS.

**A**

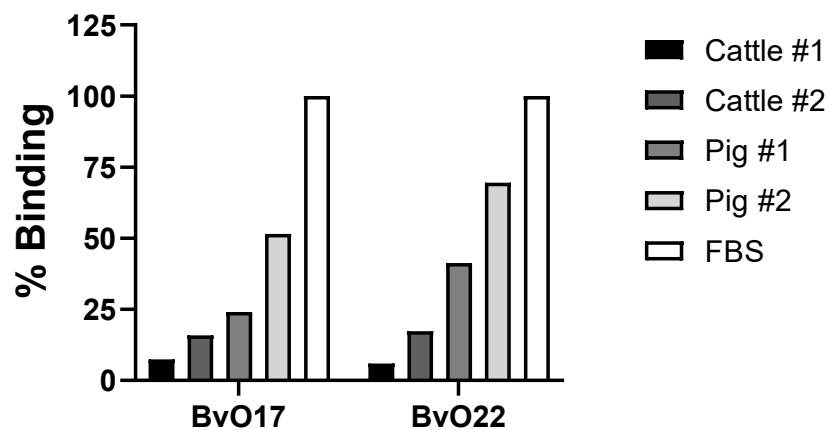

**B**

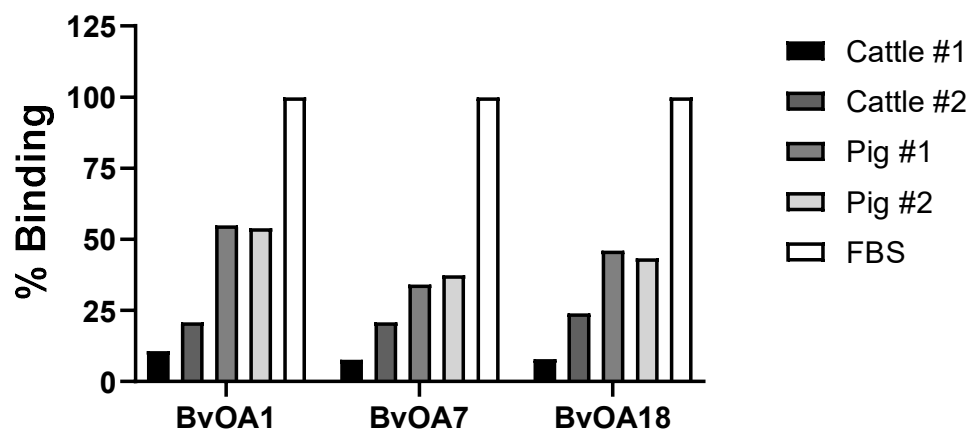

**Figure S3. Bovine scFv antibody-based SPCE using positive control anti-sera for seven serotypes of FMDV.** (A, D) PrioCHECK FMDV type O and A antibody ELISA kits were used for comparison. The control sera purchased from Pirbright Insti-tute were diluted and tested following manufacturer's instruction. (B, C) Binding of biotin-labeled BvO17 or BvOA7 to FMDV type O antigen (O1 Manisa) in the presence of 1/10 dilution of respective control serum was detected using NA-HRP. (E, F) Binding of BvA3 or biotin-labeled BvOA7 to FMDV type A antigen (A22 Iraq) in the presence of 1/10 dilution of respective control serum was detected using HRP-conjugated anti-human IgG or NA-HRP, respectively. For all the SPCE experiments, the serum samples were tested in triplicate. One hundred percent binding corresponds to the value of absorbance obtained in the presence of negative control serum.

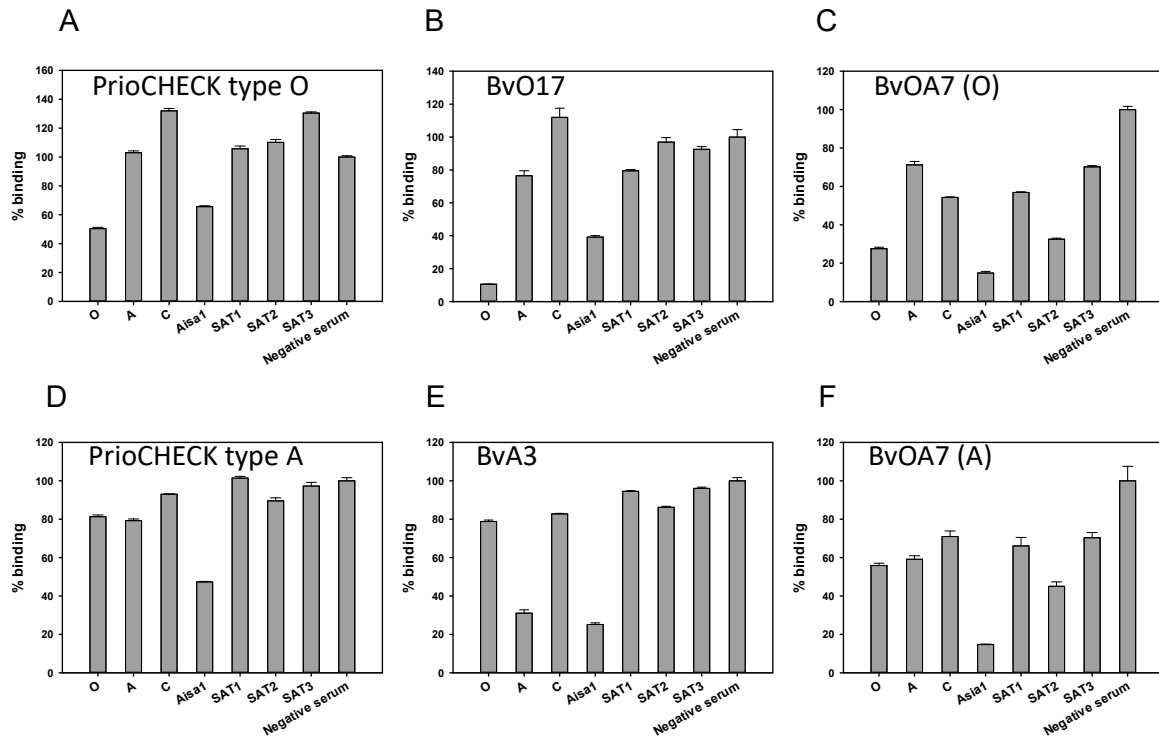

**Table S1. Primer sets for bovine antibody library construction.**

|                                                  |                                                                     |
|--------------------------------------------------|---------------------------------------------------------------------|
| <b>BVH Forward primer</b>                        | <b>Sequences (5'-3')</b>                                            |
| BVH1-2                                           | 5'-GCGGCCAGCCGGCCATGGCCCAGGTGCAGCTGCGGGAGTC-3'                      |
| BVH1Q                                            | 5'-GCGGCCAGCCGGCCATGGCCCAGGTGCAGCTGCAGGAGTC-3'                      |
| BVH1K                                            | 5'-GCGGCCAGCCGGCCATGGCCAAGGTGCAGCTGCAGGAGTC-3'                      |
| <b>BJH Reverse primer</b>                        | <b>Sequences (5'-3')</b>                                            |
| BJH1R                                            | 5'-CGAGCCGCCGCCAGATCCACCTCCACCTGAACCTCCTCCACCTGAGGAGACGGTGACCAGG-3' |
| BJH2R                                            | 5'-CGAGCCGCCGCCAGATCCACCTCCACCTGAACCTCCTCCACCTGAGGAGACGGTGACCTCG-3' |
| BJH6R                                            | 5'-CGAGCCGCCGCCAGATCCACCTCCACCTGAACCTCCTCCACCTGAGGAGACGGTGACCCTG-3' |
| <b>BVk Forward primer</b>                        | <b>Sequences (5'-3')</b>                                            |
| BVk2                                             | 5'-GGATCTGGCGGCGGCGGCTCGGATGTTGTGCTGACCCAGAC-3'                     |
| BVk4                                             | 5'-GGATCTGGCGGCGGCGGCTCGGACATCCAGGTGACCCAGTC-3'                     |
| <b>BJk Reverse primer</b>                        | <b>Sequences (5'-3')</b>                                            |
| BJk1R                                            | 5'-CTGCTCGAGGCCTCCCGGGCCTTTGATCTCTACCTTGGTTCC-3'                    |
| <b>BVλ Forward primer</b>                        | <b>Sequences (5'-3')</b>                                            |
| BVλ1                                             | 5'-GGATCTGGCGGCGGCGGCTCGCAGGCTGTGCTGACTCAGC-3'                      |
| BVλ1-6                                           | 5'-GGATCTGGCGGCGGCGGCTCGCAGGATGTGCTGACTCAGC-3'                      |
| BVλ2                                             | 5'-GGATCTGGCGGCGGCGGCTCGCAGTCTGGCCTGACTCAGC-3'                      |
| BVλ6-14                                          | 5'-GGATCTGGCGGCGGCGGCTCGTCTTCTCAGCTGACTCAGC-3'                      |
| BVλ6-156                                         | 5'-GGATCTGGCGGCGGCGGCTCGTCCTATGAACTGACCCAG-3'                       |
| BVλ7-21                                          | 5'-GGATCTGGCGGCGGCGGCTCGCAGCCTGTGCTGACTCAGC-3'                      |
| BVλ8-40                                          | 5'-GGATCTGGCGGCGGCGGCTCGCAGACTGTGATCCAGGAAC-3'                      |
| <b>BJλ Reverse primer</b>                        | <b>Sequences (5'-3')</b>                                            |
| BJλ2R                                            | 5'-CTGCTCGAGGCCTCCCGGGCCCAGGACGGTCACTCTGGTCC-3'                     |
| BJλ3R                                            | 5'-CTGCTCGAGGCCTCCCGGGCCCAGGACGGTCAGTGTGGTCC-3'                     |
| <b>VH Forward extension primer scFv assembly</b> | <b>Sequences (5'-3')</b>                                            |
| scFv-Fex                                         | 5'-GACGACGACGACGACGCGGCCAGCCGGCCATGGCC-3'                           |
| <b>VL Reverse extension primer scFv assembly</b> | <b>Sequences (5'-3')</b>                                            |
| scFv-Rex                                         | 5'-GACGACGACGACGACCTGCTCGAGGCCTCCCGGGCC-3'                          |
